# Supplementary material for: Neural signatures of auditory hypersensitivity following acoustic trauma
Source: eLife journal article supplement (doi:10.7554/elife.80015), 2022-09-16
Supplement: supp [file elife-80015-supp-v1.zip]

Archive with 4 entries (4 files):
- elife_poa_e80015_Figure_5_figure_supplement_1.pdf
- elife_poa_e80015_Figure_6_figure_supplement_1.pdf
- elife_poa_e80015_Figure_8_figure_supplement_1.pdf
- elife_poa_e80015_Supplementary_file_1.docx
