# Supplementary figures and images for: Neural signatures of auditory hypersensitivity following acoustic trauma
Source: eLife journal article supplement (doi:10.7554/elife.80015), 2022-09-16

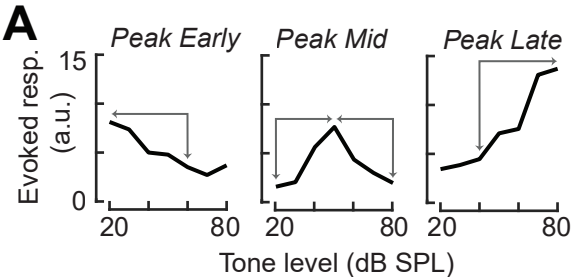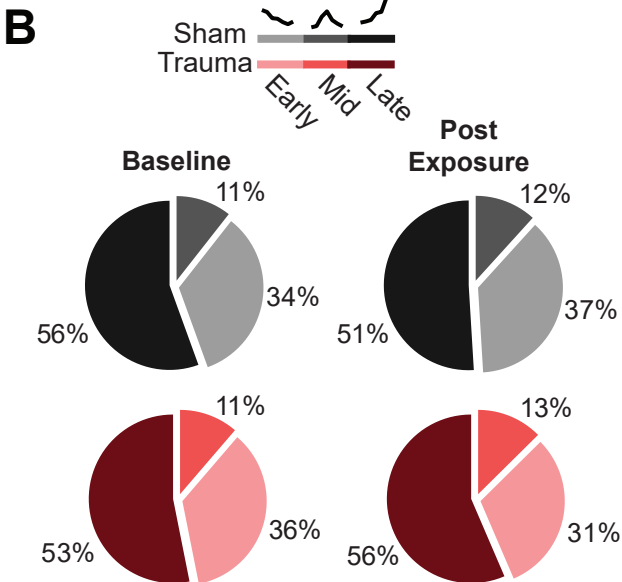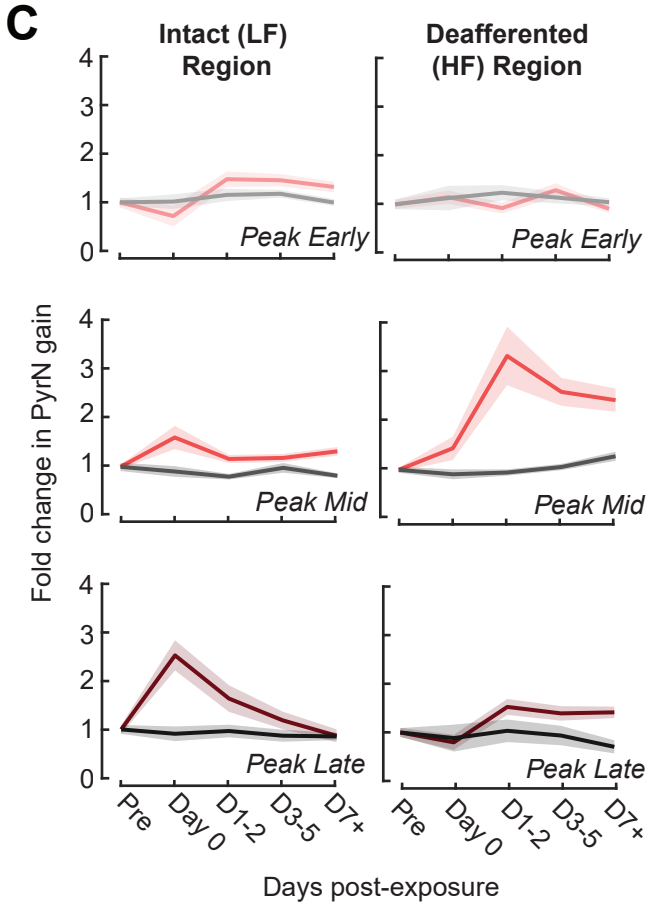

Supplement: supp [file elife-80015-supp-v1.zip › elife_poa_e80015_Figure_5_figure_supplement_1.pdf]

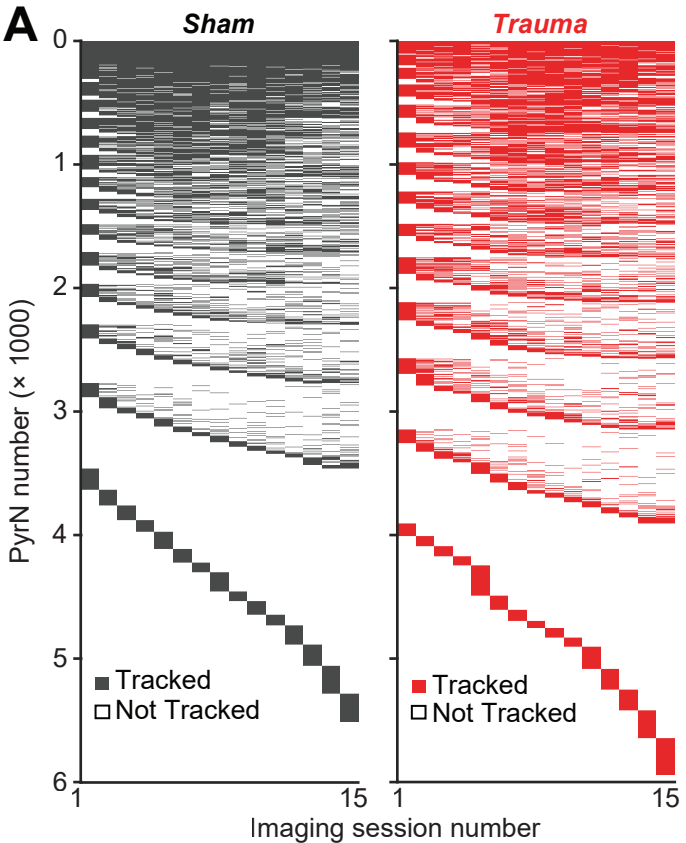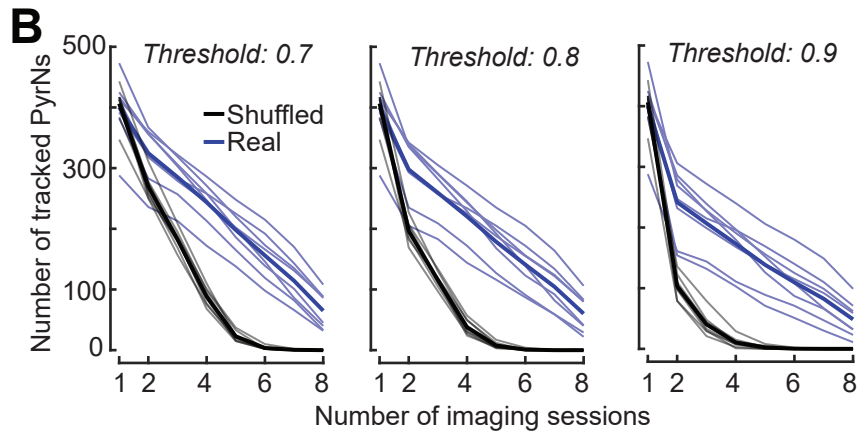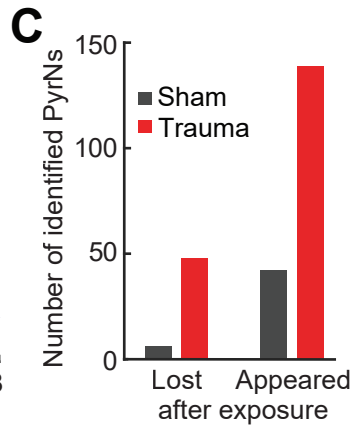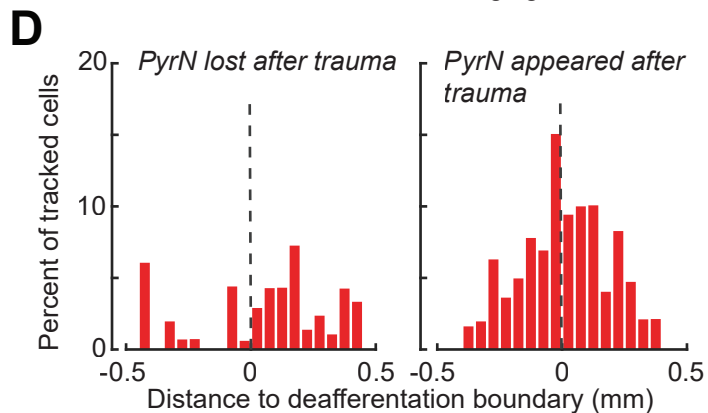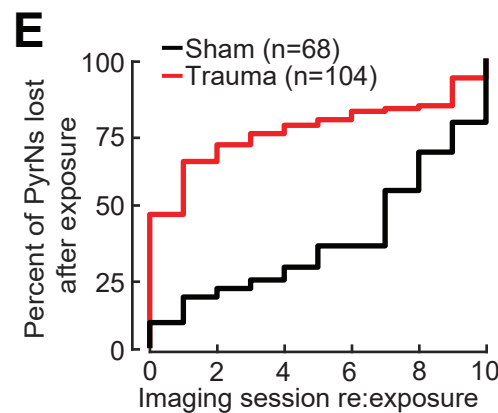

Supplement: supp [file elife-80015-supp-v1.zip › elife_poa_e80015_Figure_6_figure_supplement_1.pdf]

**A**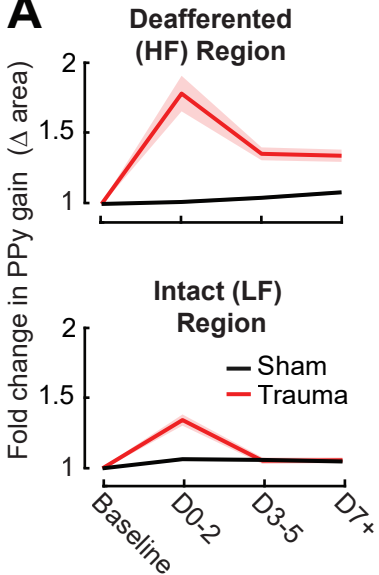**B**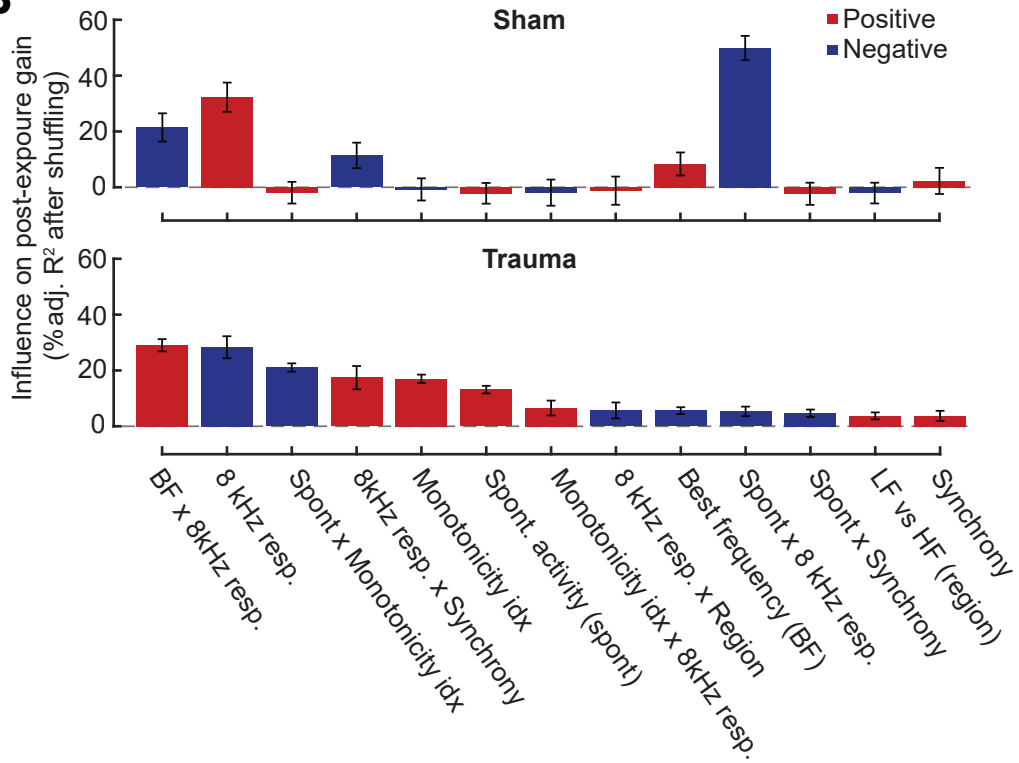

Supplement: supp [file elife-80015-supp-v1.zip › elife_poa_e80015_Figure_8_figure_supplement_1.pdf]
